# Supplementary material
Source: PubMed Central journal article supplement (PMC2774999)
Supplement: fj.08-117804_1.pdf [file fj.08-117804_1.pdf]

**A**

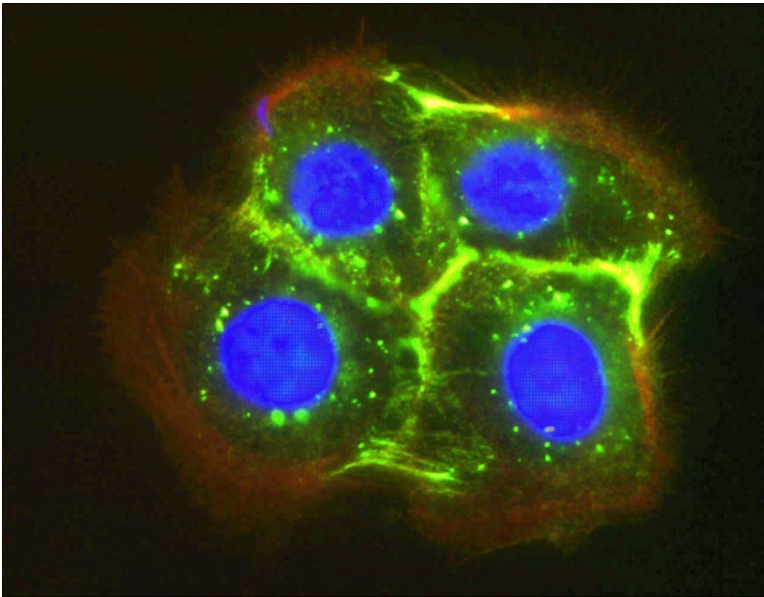

**B**

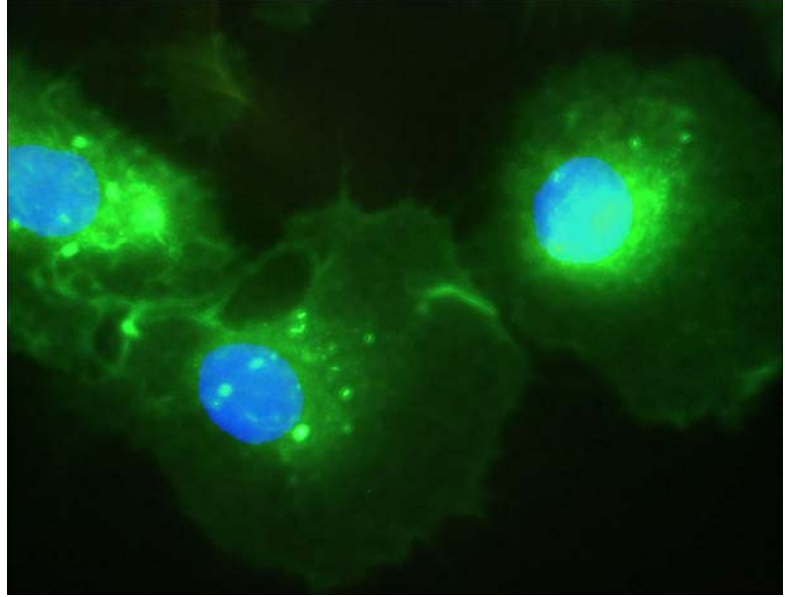

**Figure S1**

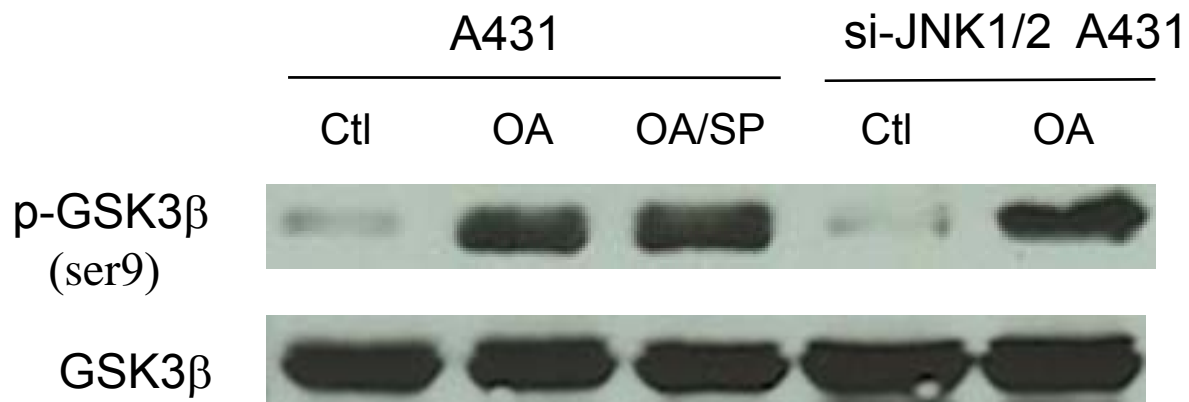

**Figure S2**

(A)

|                            |   |   |   |   |
|----------------------------|---|---|---|---|
| HA- $\beta$ catenin        | - | + | - | - |
| HA- $\beta$ catenin (S37A) | - | - | + | - |
| HA- $\beta$ catenin (T41A) | - | - | - | + |

HA- $\beta$ -catenin

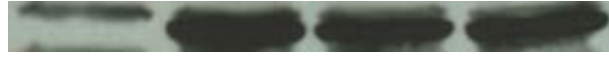

$\beta$ -actin

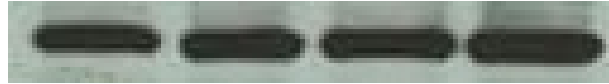

(B)

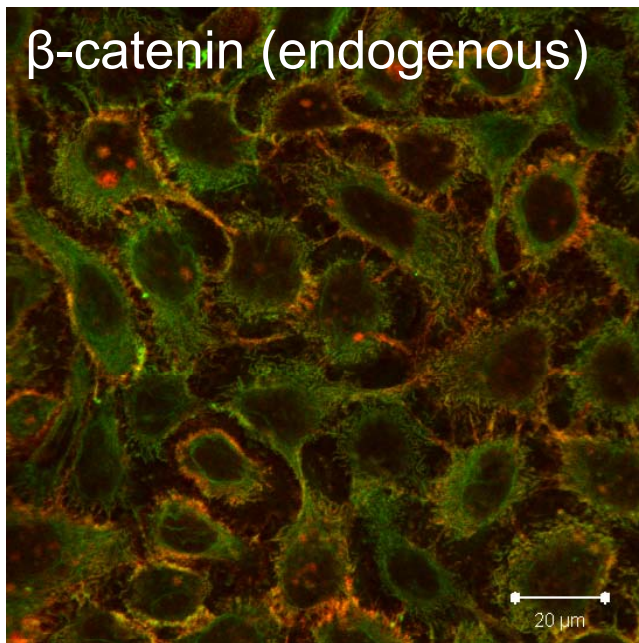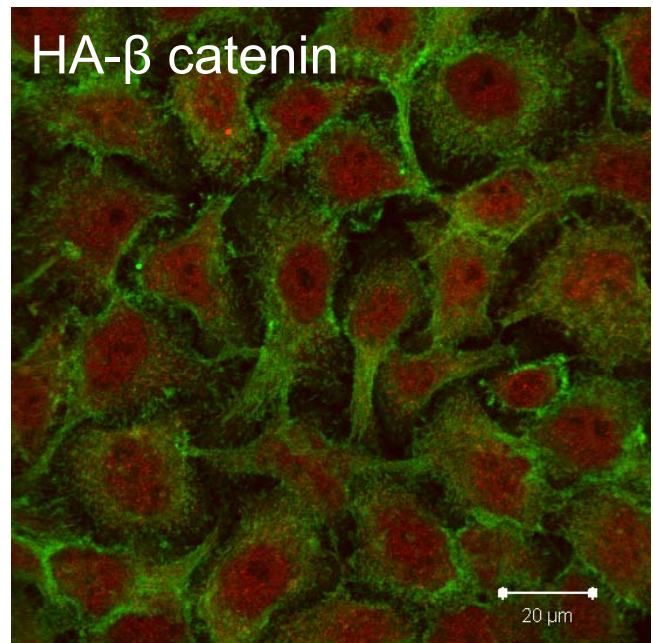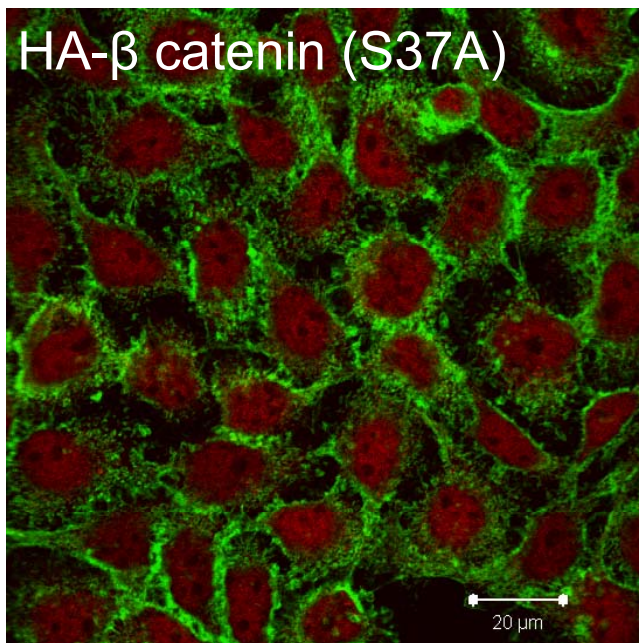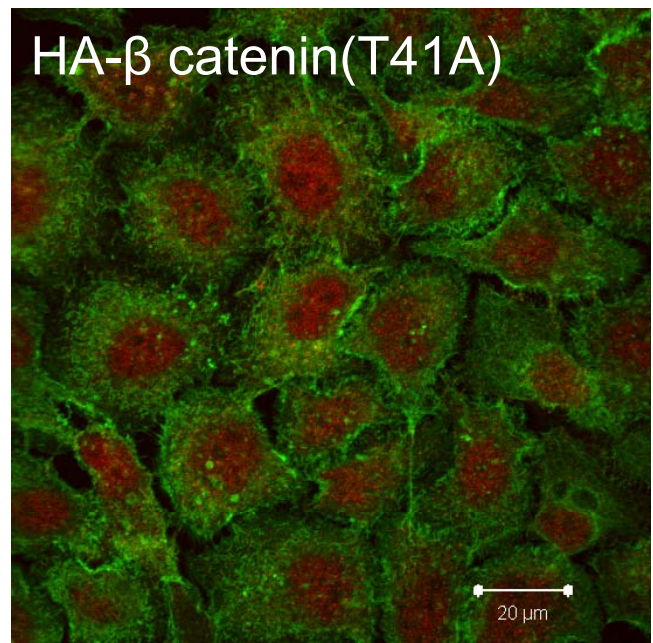

Figure S3



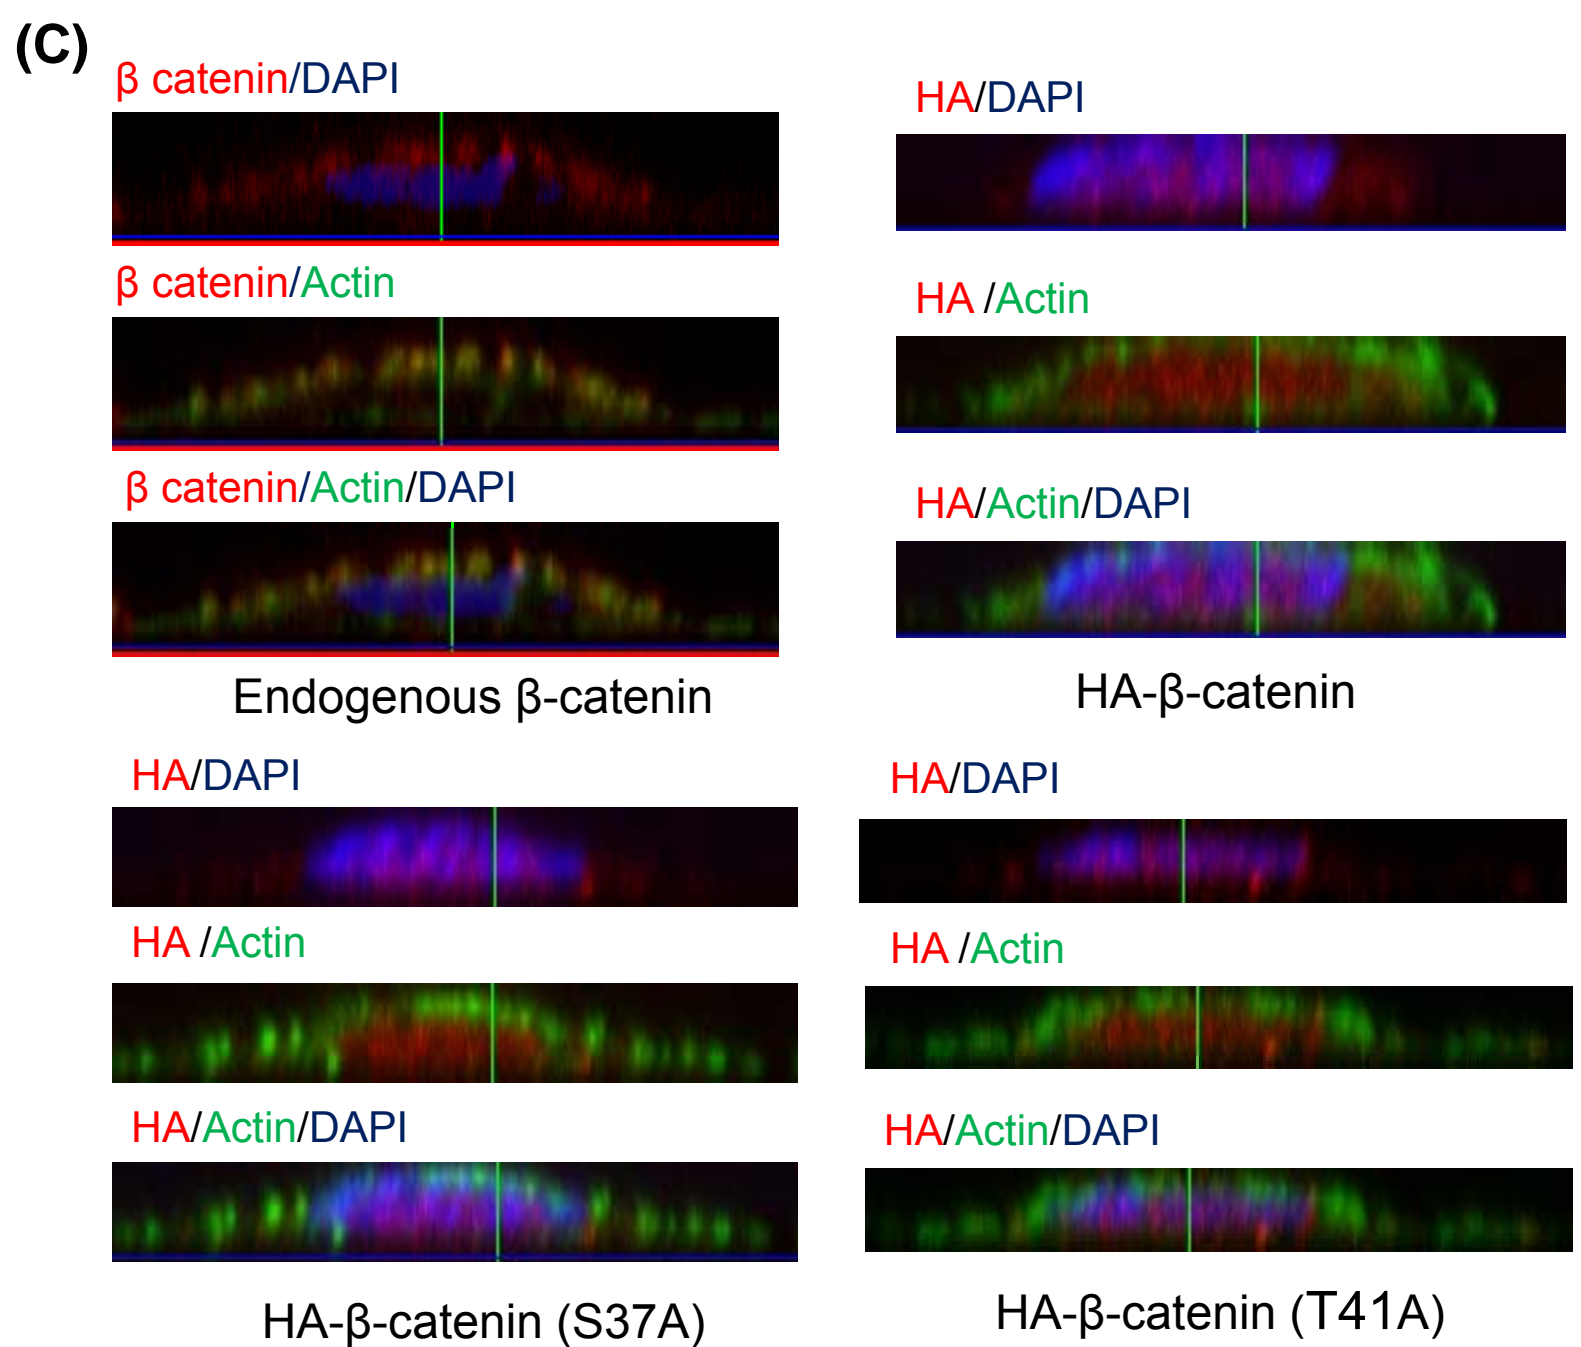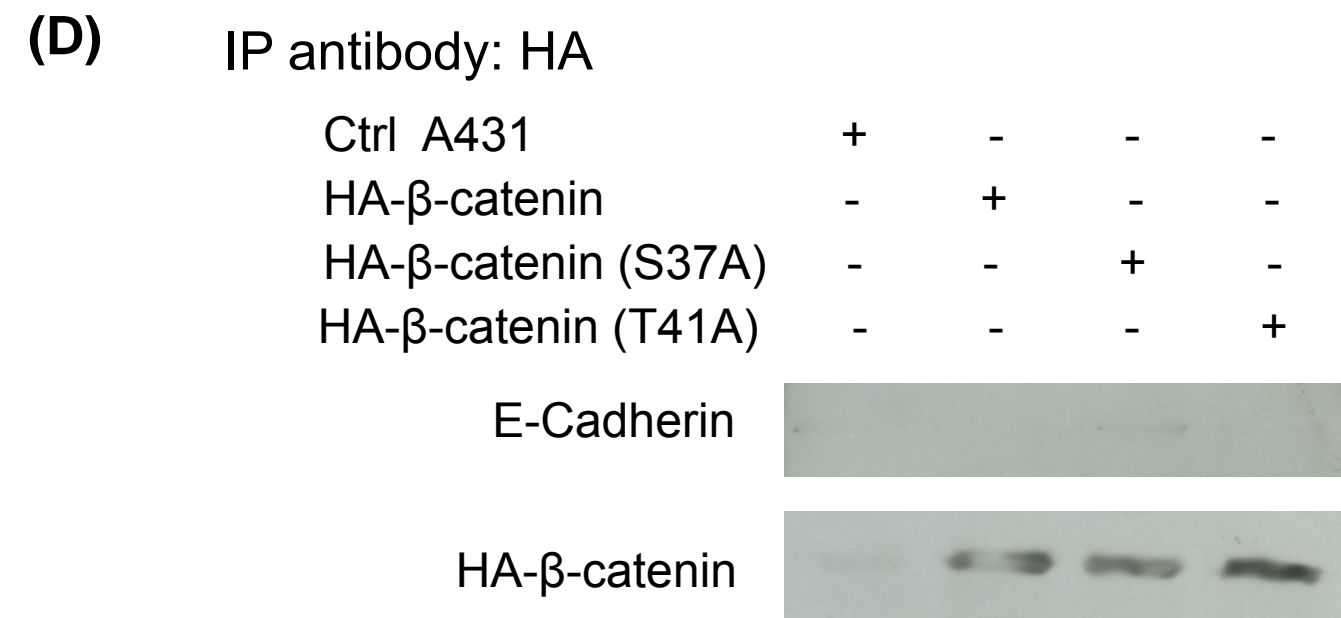

**Figure S3**

(E)

$\beta$ -Catenin

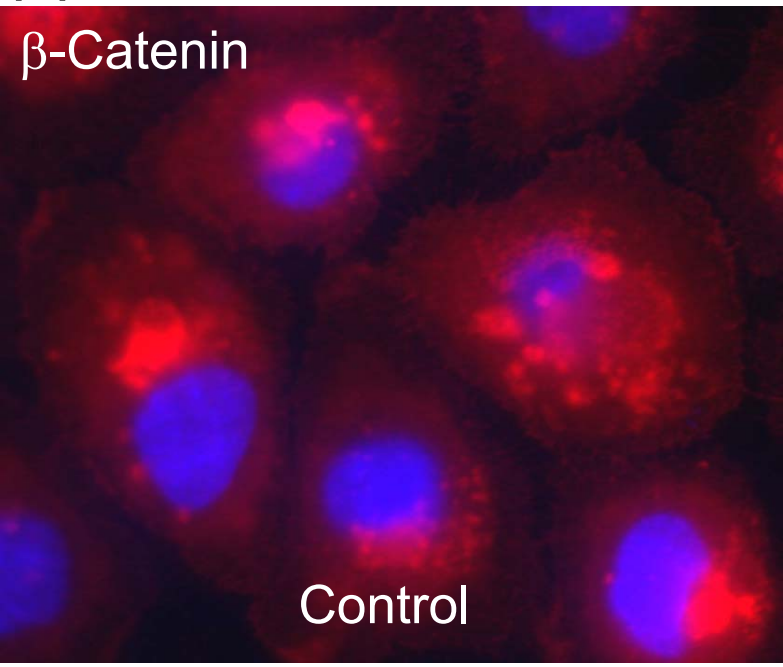

Control

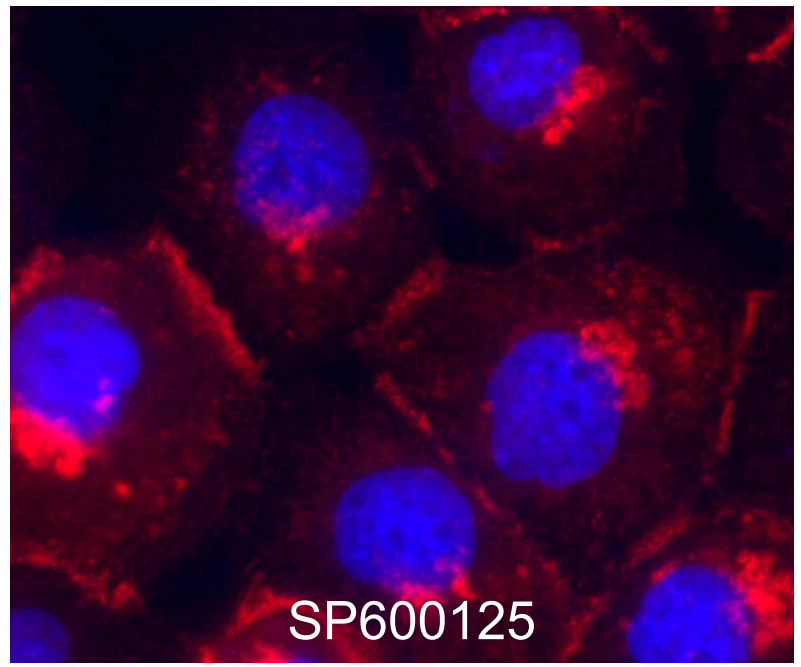

SP600125

p- $\beta$ -Catenin (ser37)

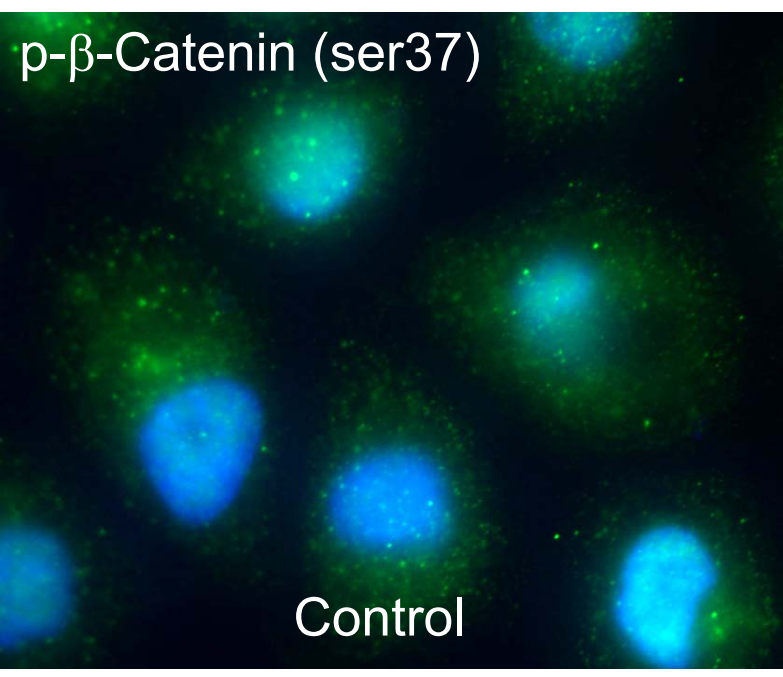

Control

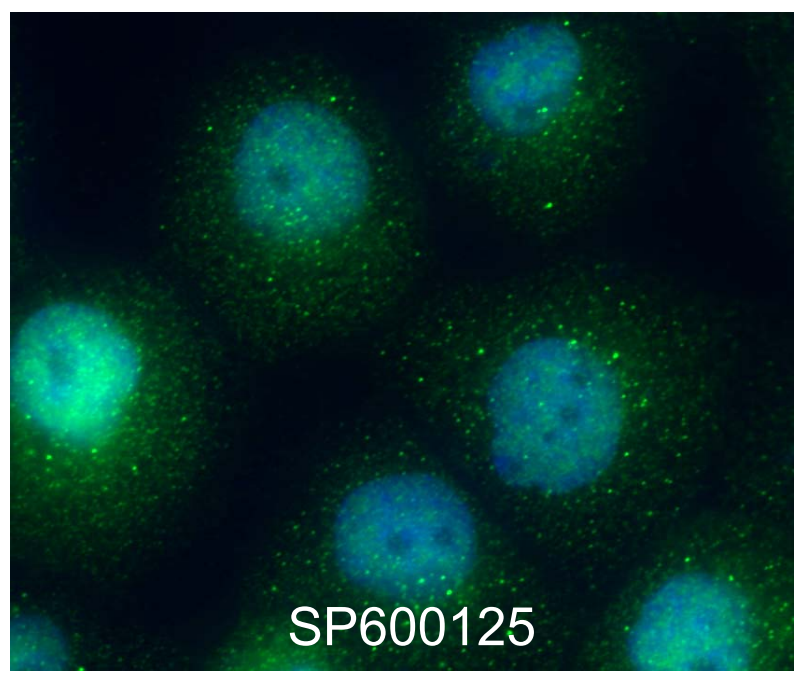

SP600125

Merged

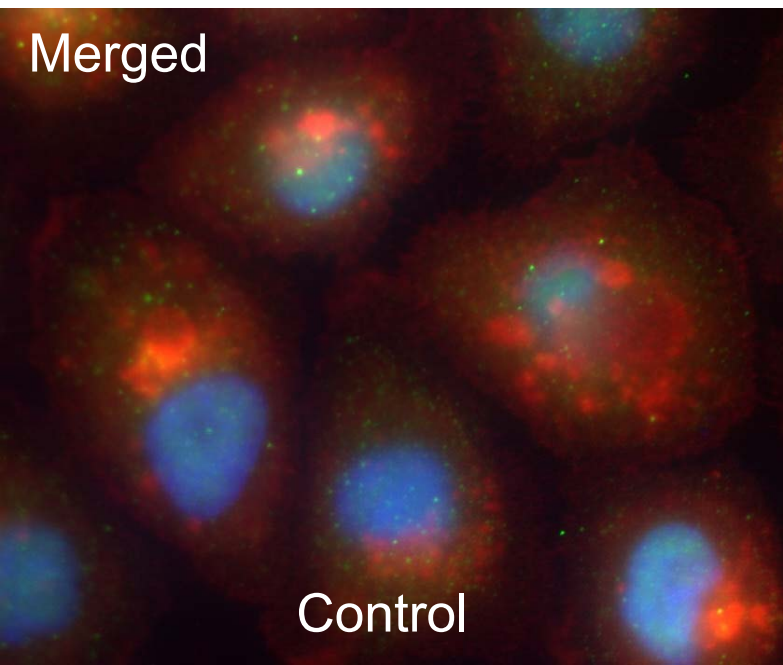

Control

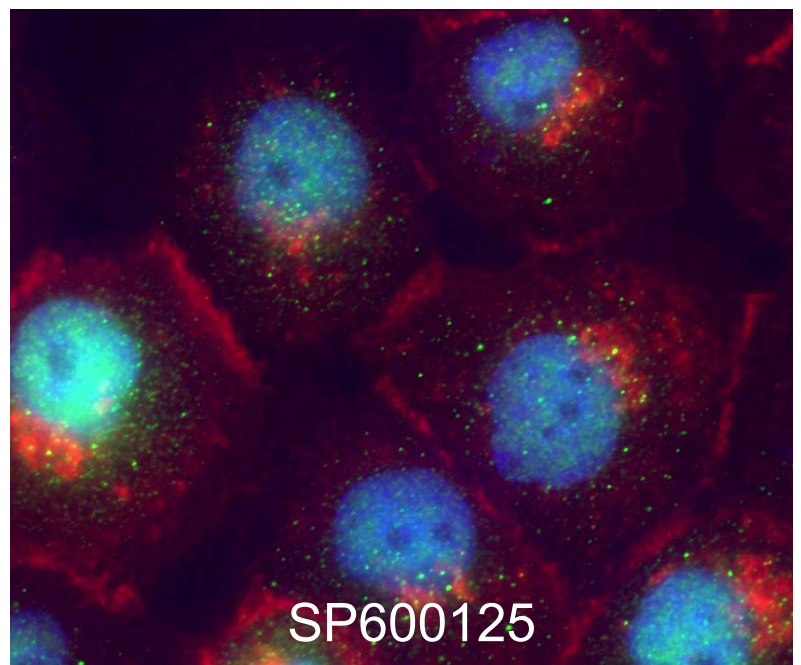

SP600125
